# Supplementary material
Source: Springer Nature journal article supplement (https://www.springermedizin.de/resource/supplementary/12990_2009_258_MOESM8_ESM.pdf/9612902)

# Masseter - CFA

# Skin - CFA

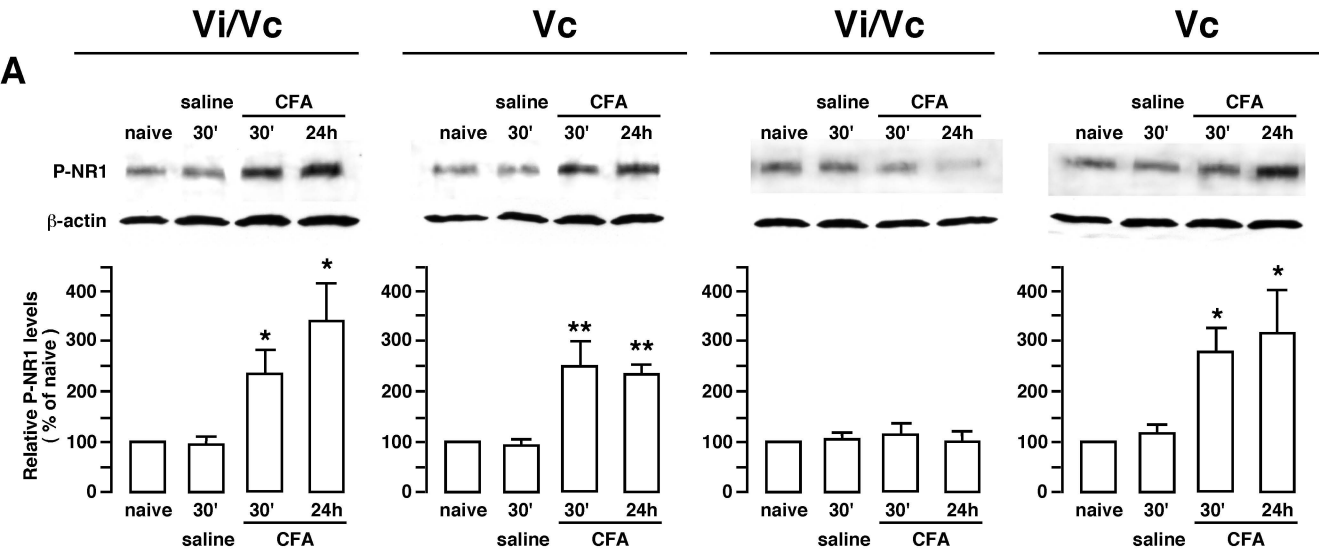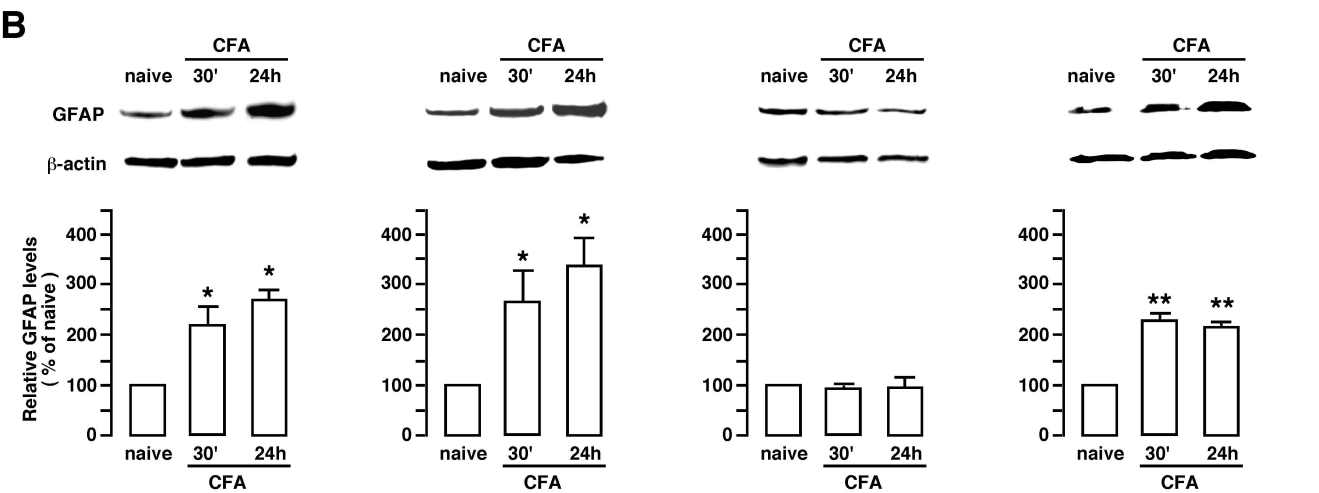

Supplement: MOESM8 [file 9612902]
